# Supplementary material for: Optimizing management of low back pain through the pain and disability drivers management model: A feasibility trial
Source: PubMed Central journal article supplement (PMC7817044; doi:10.1371/journal.pone.0245689), 2021-01-20
Supplement: pone.0245689.s008.pdf [file pone.0245689.s008.pdf]

Perception of the PDDM model's contribution (T3):

1. Has the PDDM model contributed to your patient's assessment?
  - a. If yes, can you explain to me how the model has contributed to your patient's assessment?
2. Following your patient's assessment, has the PDDM model contributed to establish a treatment plan with your patient?
3. Has the PDDM model contributed to your patient's assessment?
  - b. If yes, can you explain to me how the model has contributed to your patient's assessment?
4. Following your patient's assessment, has the PDDM model contributed to establish a treatment plan with your patient?
